# Supplementary material
Source: PubMed Central journal article supplement (PMC3062311)
Supplement: blood-2010-06-292219_1.pdf [file blood-2010-06-292219_1.pdf]

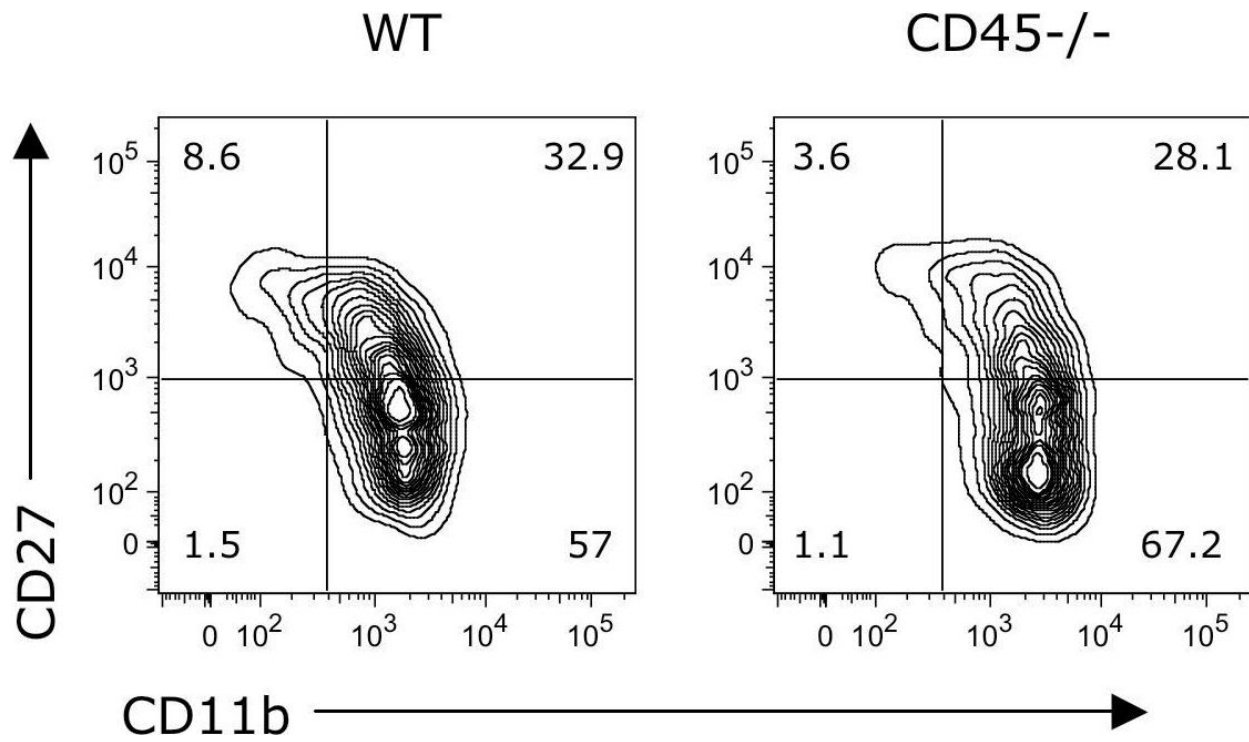

**Figure S1. NK cell maturation is unperturbed in the absence of CD45**

Blood cells were gated on NK1.1<sup>+</sup>CD3<sup>-</sup> NK cells and stained for the maturation markers CD27 and CD11b. Similar results were seen in ten wildtype and 10 CD45-deficient mice.

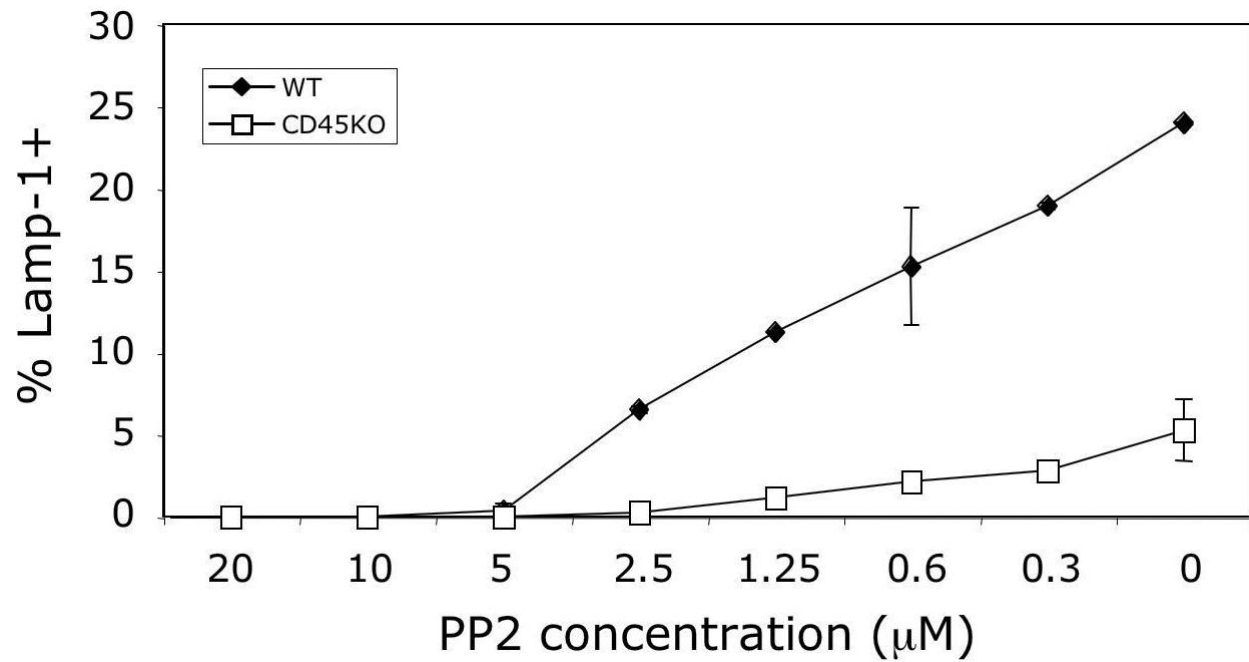

**Figure S2. ITAM-dependent degranulation is less sensitive to Src kinase inhibition in the absence of CD45**

Enriched NK cells were incubated for 30 minutes in the presence of varying amounts of the Src kinase inhibitor, PP2. The cells were then incubated on plates coated with mAb against NKp46 for 4 hours in the presence of anti-CD107a and varying amounts of PP2.
